# Supplementary material for: Timing of Recanalization and Functional Recovery in Acute Ischemic Stroke
Source: PubMed Central journal article supplement — J Stroke. 2020 Jan 31;22(1):130–40. doi: 10.5853/jos.2019.01648 (PMC7005347; doi:10.5853/jos.2019.01648), 2020-01-31
Supplement: jos-2019-01648-suppl2.pdf [file jos-2019-01648-suppl2.pdf]

**Supplementary Table 1.** Outcome definitions from the transcranial Doppler monitoring

| Outcome variable            | Definition                                                                                             |
|-----------------------------|--------------------------------------------------------------------------------------------------------|
| Early recanalization        | Complete or partial recanalization within the first 60 minutes following tPA-bolus                     |
| Delayed recanalization      | Complete or partial recanalization within the time interval between 60–120 minutes following tPA-bolus |
| Sustained recanalization    | Complete or partial recanalization at 120 minutes following tPA-bolus                                  |
| Persisting occlusion        | Lack of any recanalization within 120 minutes following tPA-bolus                                      |
| Timing of recanalization    | Elapsed time between symptom onset to beginning of recanalization                                      |
| Beginning of recanalization | The time point that at least 1 point improvement in TIBI score is noticed during the TCD monitoring    |

tPA, tissue plasminogen activator; TIBI, thrombolysis in brain ischemia; TCD, transcranial Doppler.

**Supplementary Table 2.** Baseline characteristics of the whole study population (n=480)

| Variable                                          | Value         |
|---------------------------------------------------|---------------|
| Age (yr)                                          | 66±15         |
| Male sex                                          | 289 (60)      |
| NIHSS-score (points)                              | 15 (10–19)    |
| Hypertension                                      | 325 (70)      |
| Diabetes mellitus                                 | 116 (24)      |
| Atrial fibrillation                               | 145 (30)      |
| Hypercholesterolemia                              | 186 (39)      |
| Coronary artery disease                           | 119 (25)      |
| Baseline TIBI score 0–1                           | 251 (52)      |
| Isolated ICA or tandem ICA/MCA occlusion          | 68 (14)       |
| Systolic blood pressure before tPA-bolus (mm Hg)  | 157±26        |
| Diastolic blood pressure before tPA-bolus (mm Hg) | 87±16         |
| Serum glucose before tPA-bolus (mg/dL)            | 133±51        |
| Time from symptom onset to tPA-bolus (min)        | 140 (116–170) |
| Endovascular reperfusion therapy                  | 12 (2)        |

Values are presented as mean±standard deviation, number (%), or median (interquartile range).

NIHSS, National Institutes of Health Stroke Scale; TIBI, thrombolysis in brain ischemia; ICA, internal carotid artery; MCA, middle cerebral artery; tPA, tissue plasminogen activator.
