# Supplementary material for: Timing of Recanalization and Functional Recovery in Acute Ischemic Stroke
Source: PubMed Central journal article supplement — J Stroke. 2020 Jan 31;22(1):130–40. doi: 10.5853/jos.2019.01648 (PMC7005347; doi:10.5853/jos.2019.01648), 2020-01-31
Supplement: jos-2019-01648-suppl4.pdf [file jos-2019-01648-suppl4.pdf]

**Supplementary Table 3.** Baseline characteristics and outcomes of study population (n=480) according to recanalization status during the 2-hour TCD-monitoring

| Variable                                          | Complete or partial recanalization (n=301) | Persisting occlusion (n=179) | P                    |
|---------------------------------------------------|--------------------------------------------|------------------------------|----------------------|
| <b>Baseline characteristic</b>                    |                                            |                              |                      |
| Age (yr)                                          | 64±14                                      | 69±15                        | <0.001*              |
| Male sex                                          | 196 (65)                                   | 93 (52)                      | 0.005 <sup>†</sup>   |
| NIHSS-score (point)                               | 14 (9–19)                                  | 16 (10–20)                   | 0.013*               |
| Hypertension                                      | 196 (65)                                   | 129 (73)                     | 0.096 <sup>†</sup>   |
| Diabetes mellitus                                 | 68 (23)                                    | 48 (27)                      | 0.280 <sup>†</sup>   |
| Atrial fibrillation                               | 87 (29)                                    | 58 (32)                      | 0.420 <sup>†</sup>   |
| Hypercholesterolemia                              | 126 (42)                                   | 60 (35)                      | 0.123 <sup>†</sup>   |
| Coronary artery disease                           | 78 (26)                                    | 41 (23)                      | 0.460 <sup>†</sup>   |
| Baseline TIBI score 0–1                           | 155 (52)                                   | 96 (54)                      | 0.650 <sup>†</sup>   |
| Isolated ICA or tandem ICA/MCA occlusion          | 30 (10)                                    | 38 (21)                      | 0.001 <sup>†</sup>   |
| Systolic blood pressure before tPA-bolus (mm Hg)  | 159±26                                     | 154±27                       | 0.085*               |
| Diastolic blood pressure before tPA-bolus (mm Hg) | 89±15                                      | 85±16                        | 0.001*               |
| Serum glucose before tPA-bolus (mg/dL)            | 130±52                                     | 136±48                       | 0.104*               |
| Time from symptom onset to tPA-bolus (min)        | 135 (113–168)                              | 145 (120–172)                | 0.138*               |
| Endovascular reperfusion therapy                  | 6 (2)                                      | 6 (3)                        | 0.356 <sup>†</sup>   |
| <b>Outcome</b>                                    |                                            |                              |                      |
| Symptomatic intracerebral hemorrhage              | 8 (3)                                      | 11 (6)                       | 0.058 <sup>†</sup>   |
| Dramatic clinical recovery at 2-hr <sup>*</sup>   | 143 (50)                                   | 7 (4)                        | <0.001 <sup>†</sup>  |
| Dramatic clinical recovery at 24-hr <sup>§</sup>  | 181 (61)                                   | 20 (12)                      | <0.001 <sup>  </sup> |
| 3-mo favorable functional outcome, mRS 0–1        | 199 (66)                                   | 33 (18)                      | <0.001 <sup>†</sup>  |
| 3-mo functional independence, mRS 0–2             | 238 (79)                                   | 54 (30)                      | <0.001 <sup>†</sup>  |
| 3-mo mortality                                    | 19 (6)                                     | 36 (20)                      | <0.001 <sup>†</sup>  |
| 3-mo mRS score                                    | 1 (0–2)                                    | 4 (2–5)                      | <0.001 <sup>†</sup>  |

Values are presented as mean±standard deviation, number (%), or median (interquartile range).

TCD, transcranial Doppler; NIHSS, National Institutes of Health Stroke Scale; TIBI, thrombolysis in brain ischemia; ICA, internal carotid artery; MCA, middle cerebral artery; tPA, tissue plasminogen activator; mRS, modified Rankin Scale.

\*P-value derived from Mann-Whitney-Wilcoxon test for independent samples; <sup>†</sup>P-value derived from Pearson's chi-square test; <sup>‡</sup>Missing data on 2-hour NIHSS for 27 patients; <sup>§</sup>Missing data on 24-hour NIHSS for 24 patients; <sup>||</sup>P-value derived from Fisher's exact test; <sup>¶</sup>P-value derived from Cochran-Mantel-Haenszel test.
