# Supplementary material for: Timing of Recanalization and Functional Recovery in Acute Ischemic Stroke
Source: PubMed Central journal article supplement — J Stroke. 2020 Jan 31;22(1):130–40. doi: 10.5853/jos.2019.01648 (PMC7005347; doi:10.5853/jos.2019.01648), 2020-01-31
Supplement: jos-2019-01648-suppl5.pdf [file jos-2019-01648-suppl5.pdf]

**Supplementary Table 4.** Baseline characteristics and outcomes of patients with middle cerebral artery occlusion (n=374) according to early recanalization status achieved during the first hour of TCD-monitoring

| Variable                                          | Early complete or partial recanalization (n=195) | Delayed recanalization or Persisting occlusion (n=179) | P                   |
|---------------------------------------------------|--------------------------------------------------|--------------------------------------------------------|---------------------|
| <b>Baseline characteristic</b>                    |                                                  |                                                        |                     |
| Age (yr)                                          | 63±14                                            | 69±15                                                  | <0.001*             |
| Male sex                                          | 125 (64)                                         | 92 (52)                                                | 0.015 <sup>†</sup>  |
| NIHSS-score (point)                               | 13 (9–18)                                        | 14 (9–18)                                              | 0.625*              |
| Hypertension                                      | 128 (66)                                         | 121 (68)                                               | 0.632 <sup>†</sup>  |
| Diabetes mellitus                                 | 43 (22)                                          | 39 (22)                                                | 0.867 <sup>†</sup>  |
| Atrial fibrillation                               | 54 (28)                                          | 63 (35)                                                | 0.174 <sup>†</sup>  |
| Hypercholesterolemia                              | 81 (41)                                          | 49 (28)                                                | 0.008 <sup>†</sup>  |
| Coronary artery disease                           | 51 (26)                                          | 42 (24)                                                | 0.548 <sup>†</sup>  |
| Baseline TIBI score 0–1                           | 103 (53)                                         | 74 (41)                                                | 0.026 <sup>†</sup>  |
| Systolic blood pressure before tPA-bolus (mm Hg)  | 160±26                                           | 150±25                                                 | <0.001*             |
| Diastolic blood pressure before tPA-bolus (mm Hg) | 90±15                                            | 83±15                                                  | <0.001*             |
| Serum glucose before tPA-bolus (mg/dL)            | 129±55                                           | 133±47                                                 | 0.532*              |
| Time from symptom onset to tPA-bolus (min)        | 135 (110–160)                                    | 145 (120–180)                                          | 0.008*              |
| Endovascular reperfusion therapies                | 3 (2)                                            | 3 (2)                                                  | 0.916 <sup>†</sup>  |
| <b>Outcome</b>                                    |                                                  |                                                        |                     |
| Symptomatic intracerebral hemorrhage              | 5 (3)                                            | 12 (7)                                                 | 0.055 <sup>†</sup>  |
| Dramatic clinical recovery at 2-hr <sup>§</sup>   | 98 (53)                                          | 19 (11)                                                | <0.001 <sup>†</sup> |
| Dramatic clinical recovery at 24-hr <sup>  </sup> | 123 (64)                                         | 37 (23)                                                | <0.001 <sup>†</sup> |
| 3-mo favorable functional outcome, mRS 0–1        | 136 (70)                                         | 54 (30)                                                | <0.001 <sup>†</sup> |
| 3-mo functional independence, mRS 0–2             | 164 (84)                                         | 78 (44)                                                | <0.001 <sup>†</sup> |
| 3-mo mortality                                    | 10 (5)                                           | 27 (15)                                                | <0.001 <sup>†</sup> |
| 3-mo mRS score                                    | 1 (0–2)                                          | 3 (1–5)                                                | <0.001 <sup>¶</sup> |

Values are presented as mean±standard deviation, number (%), or median (interquartile range).

TCD, transcranial Doppler; NIHSS, National Institutes of Health Stroke Scale; TIBI, thrombolysis in brain ischemia, tPA, tissue plasminogen activator; mRS, modified Rankin Scale.

\*P-value derived from Mann-Whitney-Wilcoxon test for independent samples; <sup>†</sup>P-value derived from Pearson's chi-square; <sup>‡</sup>P-value derived from Fisher's exact test; <sup>§</sup>Missing data on 2-hour NIHSS for 23 patients; <sup>||</sup>Missing data on 24-hour NIHSS for 19 patients; <sup>¶</sup>P-value derived from Cochran-Mantel-Haenszel test.
