# Supplementary material for: Timing of Recanalization and Functional Recovery in Acute Ischemic Stroke
Source: PubMed Central journal article supplement — J Stroke. 2020 Jan 31;22(1):130–40. doi: 10.5853/jos.2019.01648 (PMC7005347; doi:10.5853/jos.2019.01648), 2020-01-31
Supplement: jos-2019-01648-suppl6.pdf [file jos-2019-01648-suppl6.pdf]

**Supplementary Table 5.** Association of elapsed time between symptom onset and beginning of recanalization with 3-month favorable functional outcome in patients with sustained complete or partial recanalization at the end of TCD-monitoring (n=301)

| Variable                                                                  | Univariable analysis |        | Multivariable analysis |        |
|---------------------------------------------------------------------------|----------------------|--------|------------------------|--------|
|                                                                           | Odds ratio (95% CI)  | P      | Odds ratio (95% CI)    | P      |
| Age (/1 yr increase)                                                      | 0.96 (0.94–0.98)     | <0.001 | 0.97 (0.95–0.99)       | 0.007  |
| Male sex                                                                  | 1.24 (0.75–2.03)     | 0.399  | -                      |        |
| NIHSS-score (/1 point increase)                                           | 0.86 (0.82–0.90)     | <0.001 | 0.87 (0.82–0.91)       | <0.001 |
| Hypertension                                                              | 0.75 (0.45–1.25)     | 0.265  | -                      |        |
| Diabetes mellitus                                                         | 1.01 (0.57–1.79)     | 0.972  | -                      |        |
| Atrial fibrillation                                                       | 0.64 (0.38–1.07)     | 0.086  | -                      |        |
| Hypercholesterolemia                                                      | 0.93 (0.57–1.51)     | 0.775  | -                      |        |
| Coronary artery disease                                                   | 0.83 (0.48–1.42)     | 0.491  | -                      |        |
| Baseline TIBI score 0–1                                                   | 0.61 (0.37–0.99)     | 0.044  | 1.27 (0.70–2.31)       | 0.431  |
| Isolate ICA or tandem ICA/MCA occlusion                                   | 0.35 (0.16–0.76)     | 0.007  | 0.56 (0.23–1.35)       | 0.194  |
| Systolic blood pressure before tPA-bolus (/10 mm Hg increase)             | 0.92 (0.83–1.01)     | 0.066  | -                      |        |
| Diastolic blood pressure before tPA-bolus (/10 mm Hg increase)            | 0.84 (0.71–1.00)     | 0.050  | -                      |        |
| Mean serum glucose before tPA-bolus (/10 mg/dL increase)                  | 0.98 (0.94–1.03)     | 0.387  | -                      |        |
| Time from symptom onset to tPA-bolus (/10 min increase)                   | 0.95 (0.90–1.00)     | 0.052  | -                      |        |
| Endovascular reperfusion therapies                                        | 2.60 (0.30–22.58)    | 0.385  |                        |        |
| Time from symptom onset to beginning of recanalization (/30 min increase) | 0.83 (0.73–0.94)     | 0.003  | 0.84 (0.73–0.97)       | 0.015  |

TCD, transcranial Doppler; CI, confidence interval; NIHSS, National Institutes of Health Stroke Scale; TIBI, thrombolysis in brain ischemia; ICA, internal carotid artery; MCA, middle cerebral artery; tPA, tissue plasminogen activator.
