# Supplementary material for: Timing of Recanalization and Functional Recovery in Acute Ischemic Stroke
Source: PubMed Central journal article supplement — J Stroke. 2020 Jan 31;22(1):130–40. doi: 10.5853/jos.2019.01648 (PMC7005347; doi:10.5853/jos.2019.01648), 2020-01-31
Supplement: jos-2019-01648-suppl7.pdf [file jos-2019-01648-suppl7.pdf]

**Supplementary Table 6.** Association of baseline characteristics with the elapsed time between tPA-bolus and start of recanalization in patients with sustained complete or partial recanalization at the end of TCD-monitoring (n=301)

| Variable                                                       | Univariable analysis                                  |        | Multivariable analysis                                |        |
|----------------------------------------------------------------|-------------------------------------------------------|--------|-------------------------------------------------------|--------|
|                                                                | Unstandardized linear regression coefficient (95% CI) | P      | Unstandardized linear regression coefficient (95% CI) | P      |
| Age (/1 yr increase)                                           | 0.19 (-0.02 to 0.41)                                  | 0.080  | -                                                     | -      |
| Male sex                                                       | -0.78 (-7.32 to 5.77)                                 | 0.816  | -                                                     | -      |
| NIHSS-score (/1 point increase)                                | -0.02 (-0.50 to 0.45)                                 | 0.924  | -                                                     | -      |
| Hypertension                                                   | 1.82 (-4.72 to 8.36)                                  | 0.585  | -                                                     | -      |
| Diabetes mellitus                                              | -3.13 (-10.56 to 4.29)                                | 0.407  | -                                                     | -      |
| Atrial fibrillation                                            | 3.50 (-3.37 to 10.37)                                 | 0.317  | -                                                     | -      |
| Hypercholesterolemia                                           | -1.54 (-7.86 to 4.78)                                 | 0.632  | -                                                     | -      |
| Coronary artery disease                                        | -0.31 (-7.41 to 6.78)                                 | 0.931  | -                                                     | -      |
| Baseline TIBI score 0-1                                        | -2.30 (-8.53 to 3.92)                                 | 0.467  | -                                                     | -      |
| Isolate ICA or tandem ICA/MCA occlusion                        | 7.52 (-2.82 to 17.86)                                 | 0.153  | -                                                     | -      |
| Systolic blood pressure before tPA-bolus (/10 mm Hg increase)  | -0.60 (-1.70 to 0.60)                                 | 0.351  | -                                                     | -      |
| Diastolic blood pressure before tPA-bolus (/10 mm Hg increase) | -0.40 (-2.50 to 1.70)                                 | 0.719  | -                                                     | -      |
| Mean serum glucose before tPA-bolus (/10 mg/dL increase)       | 0.36 (-0.22 to 0.96)                                  | 0.225  | -                                                     | -      |
| Endovascular reperfusion therapies                             | 7.57 (-10.73 to 25.87)                                | 0.416  | -                                                     | -      |
| Elapsed time between stroke onset and tPA-bolus (min)          | 0.13 (0.06 to 0.19)                                   | <0.001 | 0.13 (0.06 to 0.19)                                   | <0.001 |

tPA, tissue plasminogen activator; TCD, transcranial Doppler; CI, confidence interval; NIHSS, National Institutes of Health Stroke Scale; TIBI, thrombolysis in brain ischemia; ICA, internal carotid artery; MCA, middle cerebral artery.
