# Supplementary material for: Timing of Recanalization and Functional Recovery in Acute Ischemic Stroke
Source: PubMed Central journal article supplement — J Stroke. 2020 Jan 31;22(1):130–40. doi: 10.5853/jos.2019.01648 (PMC7005347; doi:10.5853/jos.2019.01648), 2020-01-31
Supplement: jos-2019-01648-suppl8.pdf [file jos-2019-01648-suppl8.pdf]

**Supplementary Table 7.** Association of elapsed time between symptom onset and beginning of recanalization with symptomatic intracranial hemorrhage in the study population (n=480)

| Variable                                                       | Univariable analysis |       | Multivariable analysis |        |
|----------------------------------------------------------------|----------------------|-------|------------------------|--------|
|                                                                | Odds ratio (95% CI)  | P     | Odds ratio (95% CI)    | P      |
| Age (/1 yr increase)                                           | 1.02 (0.99–1.05)     | 0.219 | -                      |        |
| Male sex                                                       | 2.55 (0.83–7.79)     | 0.102 | -                      |        |
| NIHSS-score (per 1 point increase)                             | 1.06 (0.99–1.14)     | 0.084 | -                      |        |
| Hypertension                                                   | 0.81 (0.31–2.09)     | 0.656 | -                      |        |
| Diabetes mellitus                                              | 1.88 (0.72–4.89)     | 0.196 | -                      |        |
| Atrial fibrillation                                            | 1.07 (0.40–2.87)     | 0.894 | -                      |        |
| Hypercholesterolemia                                           | 0.18 (0.04–0.81)     | 0.026 | 0.11 (0.02–0.62)       | 0.012  |
| Coronary artery disease                                        | 0.80 (0.26–2.47)     | 0.701 | -                      |        |
| Baseline TIBI score 0–1                                        | 2.03 (0.76–5.43)     | 0.159 | -                      |        |
| Isolate ICA or tandem ICA/MCA occlusion                        | 0.33 (0.04–2.49)     | 0.280 | -                      |        |
| Systolic blood pressure before tPA-bolus (/10 mm Hg increase)  | 1.08 (0.90–1.29)     | 0.400 | -                      |        |
| Diastolic blood pressure before tPA-bolus (/10 mm Hg increase) | 1.01 (0.75–1.37)     | 0.929 | -                      |        |
| Mean serum glucose before tPA-bolus (/10 mg/dL increase)       | 1.10 (1.04–1.17)     | 0.002 | 1.14 (1.06–1.22)       | <0.001 |
| Time from symptom onset to tPA-bolus (/10 min increase)        | 1.08 (0.98–1.19)     | 0.103 | -                      |        |
| Endovascular reperfusion therapies                             | 2.27 (0.28–18.57)    | 0.444 | -                      | -      |
| Time from symptom onset to beginning of recanalization         |                      |       |                        |        |
| Persisting occlusion (reference category) ≤178 min             | 0.42 (0.13–1.34)     | 0.142 | -                      |        |
| Persisting occlusion (reference category) >178 min             | 0.42 (0.13–1.36)     | 0.149 | -                      |        |

CI, confidence interval; NIHSS, National Institutes of Health Stroke Scale; TIBI, thrombolysis in brain ischemia; ICA, internal carotid artery; MCA, middle cerebral artery; tPA, tissue plasminogen activator.
