# Supplementary material for: Timing of Recanalization and Functional Recovery in Acute Ischemic Stroke
Source: PubMed Central journal article supplement — J Stroke. 2020 Jan 31;22(1):130–40. doi: 10.5853/jos.2019.01648 (PMC7005347; doi:10.5853/jos.2019.01648), 2020-01-31
Supplement: jos-2019-01648-suppl9.pdf [file jos-2019-01648-suppl9.pdf]

**Supplementary Table 8.** Association of elapsed time between symptom onset and beginning of recanalization with symptomatic intracranial hemorrhage in patients with sustained complete or partial recanalization at the end of TCD-monitoring (n=301)\*

| Variable                                                                  | Univariable analysis       |                     |
|---------------------------------------------------------------------------|----------------------------|---------------------|
|                                                                           | Odds ratio (95% CI)        | P                   |
| Age (/1 yr increase)                                                      | 1.03 (0.98–1.09)           | 0.244               |
| Male sex                                                                  | 3.87 (0.47–31.91)          | 0.208               |
| NIHSS-score (/1 point increase)                                           | 1.09 (0.98–1.20)           | 0.100               |
| Hypertension                                                              | 0.88 (0.21–3.76)           | 0.865               |
| Diabetes mellitus                                                         | 2.10 (0.49–9.00)           | 0.320               |
| Atrial fibrillation                                                       | 0.81 (0.16–4.10)           | 0.801               |
| Hypercholesterolemia                                                      | 0.19 (0.02–1.57)           | 0.124               |
| Coronary artery disease                                                   | 1.74 (0.41–7.44)           | 0.458               |
| Baseline TIBI score 0–1                                                   | 2.88 (0.57–14.50)          | 0.200               |
| Isolate ICA or tandem ICA/MCA occlusion                                   | Not estimable <sup>†</sup> | >0.999 <sup>‡</sup> |
| Systolic blood pressure before tPA-bolus (/10 mm Hg increase)             | 1.02 (0.78–1.33)           | 0.909               |
| Diastolic blood pressure before tPA-bolus (/10 mm Hg increase)            | 0.96 (0.60–1.54)           | 0.879               |
| Mean serum glucose before tPA-bolus (/10 mg/dL increase)                  | 1.05 (0.95–1.16)           | 0.338               |
| Time from symptom onset to tPA-bolus (/10 min increase)                   | 1.09 (0.95–1.26)           | 0.231               |
| Time from symptom onset to beginning of recanalization (/30 min increase) | 1.20 (0.87–1.67)           | 0.270               |
| Endovascular reperfusion therapies                                        | Not estimable <sup>†</sup> | >0.999 <sup>‡</sup> |

TCD, transcranial Doppler; CI, confidence interval; NIHSS, National Institutes of Health Stroke Scale; TIBI, thrombolysis in brain ischemia; ICA, internal carotid artery; MCA, middle cerebral artery; tPA, tissue plasminogen activator.

\*No multivariable analysis was performed as no significant ( $P<0.05$ ) predictors were identified at the univariable analyses; <sup>†</sup>Not estimable due to lack of events (symptomatic intracranial hemorrhage) in the subgroups of patients with isolate ICA or tandem ICA/MCA occlusion or those receiving endovascular treatment; <sup>‡</sup> $P$ -value derived from Fisher's exact test.
