# Supplementary material for: Timing of Recanalization and Functional Recovery in Acute Ischemic Stroke
Source: PubMed Central journal article supplement — J Stroke. 2020 Jan 31;22(1):130–40. doi: 10.5853/jos.2019.01648 (PMC7005347; doi:10.5853/jos.2019.01648), 2020-01-31
Supplement: jos-2019-01648-suppl10.pdf [file jos-2019-01648-suppl10.pdf]

**Supplementary Table 9.** Association of elapsed time between symptom onset and beginning of recanalization with 3-month mortality in patients with sustained complete or partial recanalization at the end of TCD-monitoring (n=301)

| Variable                                                                  | Univariable analysis |                     | Multivariable analysis |        |
|---------------------------------------------------------------------------|----------------------|---------------------|------------------------|--------|
|                                                                           | Odds ratio (95% CI)  | P                   | Odds ratio (95% CI)    | P      |
| Age (/1 yr increase)                                                      | 1.11 (1.05–1.16)     | <0.001              | 1.08 (1.03–1.14)       | 0.003  |
| Male sex                                                                  | 0.92 (0.35–2.41)     | 0.862               | -                      |        |
| NIHSS-score (/1 point increase)                                           | 1.21 (1.12–1.31)     | <0.001              | 1.18 (1.08–1.28)       | <0.001 |
| Hypertension                                                              | 0.71 (0.28–1.83)     | 0.483               | -                      |        |
| Diabetes mellitus                                                         | 1.63 (0.60–4.47)     | 0.342               | -                      |        |
| Atrial fibrillation                                                       | 1.47 (0.56–3.86)     | 0.439               | -                      |        |
| Hypercholesterolemia                                                      | 0.79 (0.30–2.08)     | 0.638               | -                      |        |
| Coronary artery disease                                                   | 2.77 (1.08–7.08)     | 0.034               | 2.35 (0.82–6.75)       | 0.114  |
| Baseline TIBI score 0–1                                                   | 1.31 (0.51–3.35)     | 0.576               | -                      |        |
| Isolate ICA or tandem ICA/MCA occlusion                                   | 2.62 (0.81–8.46)     | 0.109               | -                      |        |
| Systolic blood pressure before tPA-bolus (/10 mm Hg increase)             | 0.92 (0.77–1.10)     | 0.364               | -                      |        |
| Diastolic blood pressure before tPA-bolus (/10 mm Hg increase)            | 0.94 (0.68–1.30)     | 0.692               | -                      |        |
| Mean serum glucose before tPA-bolus (/10 mg/dL increase)                  | 1.01 (0.92–1.10)     | 0.884               | -                      |        |
| Time from symptom onset to tPA-bolus (/10 min increase)                   | 0.99 (0.90–1.10)     | 0.871               | -                      |        |
| Time from symptom onset to beginning of recanalization (/30 min increase) | 1.00 (0.79–1.27)     | 0.994               | -                      |        |
| Endovascular reperfusion therapies                                        | Not estimable*       | >0.999 <sup>†</sup> | -                      |        |

TCD, transcranial Doppler; CI, confidence interval; NIHSS, National Institutes of Health Stroke Scale; TIBI, thrombolysis in brain ischemia; ICA, internal carotid artery; MCA, middle cerebral artery; tPA, tissue plasminogen activator.

\*Not estimable due to lack of events (deaths) in the subgroup of patients receiving endovascular treatment; <sup>†</sup>P-value derived from Fisher's exact test.
